# Supplementary material for: Opposite transcriptional regulation of integrated vs unintegrated HIV genomes by the NF-κB pathway
Source: PubMed Central journal article supplement (PMC4863372; doi:10.1038/srep25678), 2016-05-11
Supplement: srep25678-s1.pdf [file srep25678-s1.pdf]

## Supplementary information

### TITLE

#### **Opposite transcriptional regulation of integrated vs unintegrated HIV genomes by the NF- $\kappa$ B pathway**

Sylvain Thierry<sup>1,2</sup>, Eloïse Thierry<sup>1,3</sup>, Frédéric Subra<sup>1</sup>, Eric Deprez<sup>1</sup>, Hervé Leh<sup>1</sup>, Stéphanie Bury-Moné<sup>1,\*</sup>,  
Olivier Delelis<sup>1,\*</sup>

<sup>1</sup>LBPA, ENS Cachan, CNRS UMR8113, IDA FR3242, Université Paris-Saclay, F-94235 Cachan, France

<sup>2</sup>Present address: CNRS UMR3347 Institut Curie, Centre Universitaire d'Orsay, Paris-Sud, 91405 Orsay, France

<sup>3</sup>Present address: CIRI, INSERM U1111, CNRS UMR5308, Université Claude Bernard Lyon-1, Ecole Normale Supérieure de Lyon, Lyon 69007, France

\*These authors contributed equally to this work. Email: delelis@lbpa.ens-cachan.fr; stephanie.bury-mone@lbpa.ens-cachan.fr

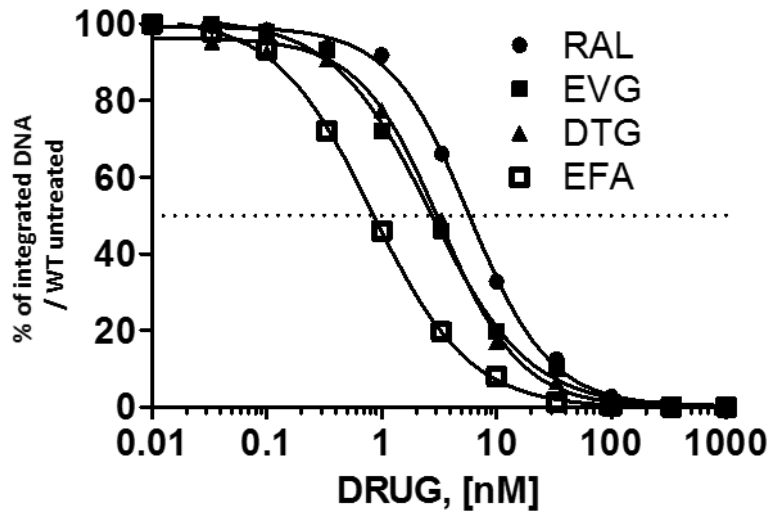

**Supplementary Figure 1: Dose-response inhibition of HIV integration by latest generations of INSITs**

MT4 T-cells were infected with HIV-1 NL4.3 strain (20 ng of p24<sub>gag</sub> antigen on 10<sup>6</sup> cells;  $\approx$  m.o.i. 0.1) in presence of various concentrations of INSITs (raltegravir, RAL; dolutegravir, DTG; elvitegravir, EVG). Incubation with a reverse-transcriptase inhibitor (Efavirenz, EFA) was used as a control condition. Integrated HIV-1 DNA was quantified 72h post-infection by qPCR. The results are presented as the percentage of integrated virus by comparison to the untreated condition.
